# Supplementary material for: CTNNB1 Alternation Is a Potential Biomarker for Immunotherapy Prognosis in Patients With Hepatocellular Carcinoma
Source: PubMed Central journal article supplement (PMC8581472; doi:10.3389/fimmu.2021.759565), 2021-10-28
Supplement: DataSheet_1.pdf [file DataSheet_1.pdf]

|                 | <b>CTNNB1-MUT<br/>(N=7)</b> | <b>CTNNB1-WT<br/>(N=20)</b> | <b>Overall<br/>(N=27)</b> |
|-----------------|-----------------------------|-----------------------------|---------------------------|
| <b>Gender</b>   |                             |                             |                           |
| Female          | 3 (42.9%)                   | 8 (40.0%)                   | 11 (40.7%)                |
| Male            | 4 (57.1%)                   | 12 (60.0%)                  | 16 (59.3%)                |
| <b>Race</b>     |                             |                             |                           |
| Asian           | 2 (28.6%)                   | 5 (25.0%)                   | 7 (25.9%)                 |
| Black           | 1 (14.3%)                   | 0 (0%)                      | 1 (3.7%)                  |
| Unknown         | 0 (0%)                      | 1 (5.0%)                    | 1 (3.7%)                  |
| White           | 4 (57.1%)                   | 14 (70.0%)                  | 18 (66.7%)                |
| <b>HCV</b>      |                             |                             |                           |
| No              | 5 (71.4%)                   | 17 (85.0%)                  | 22 (81.5%)                |
| Yes             | 2 (28.6%)                   | 3 (15.0%)                   | 5 (18.5%)                 |
| <b>HBV</b>      |                             |                             |                           |
| No              | 6 (85.7%)                   | 14 (70.0%)                  | 20 (74.1%)                |
| Yes             | 1 (14.3%)                   | 6 (30.0%)                   | 7 (25.9%)                 |
| <b>Response</b> |                             |                             |                           |
| CR              | 0 (0%)                      | 1 (5.0%)                    | 1 (3.7%)                  |
| PD              | 7 (100%)                    | 8 (40.0%)                   | 15 (55.6%)                |
| PR              | 0 (0%)                      | 2 (10.0%)                   | 2 (7.4%)                  |
| SD              | 0 (0%)                      | 9 (45.0%)                   | 9 (33.3%)                 |
