# Supplementary material for: CTNNB1 Alternation Is a Potential Biomarker for Immunotherapy Prognosis in Patients With Hepatocellular Carcinoma
Source: PubMed Central journal article supplement (PMC8581472; doi:10.3389/fimmu.2021.759565), 2021-10-28
Supplement: DataSheet_4.pdf [file DataSheet_4.pdf]

| Pathways                                    | Algorithm | Pvalue      | MUT-WT     | Function                                 | Reference                      |
|---------------------------------------------|-----------|-------------|------------|------------------------------------------|--------------------------------|
| WNT_target_PCA                              | PCA       | 1.49E-05    | MUT-UP**** | Promote tumor growth and drug resistance | doi: 10.3389/fimmu.2021.687975 |
| Fatty_Acid_Elongation_PCA                   | PCA       | 9.35E-05    | MUT-UP**** | Promote tumor growth and drug resistance | doi: 10.3389/fimmu.2021.687975 |
| Biosynthesis_of_Unsaturated_Fatty_Acids_PCA | PCA       | 6.02E-05    | MUT-UP**** | Promote tumor growth and drug resistance | doi: 10.3389/fimmu.2021.687975 |
| Drug_Metabolism_by_Cytochrome_P450_PCA      | PCA       | 1.33E-14    | MUT-UP**** | Promote tumor growth and drug resistance | doi: 10.3389/fimmu.2021.687975 |
| Drug_Metabolism_by_other_enzymes_PCA        | PCA       | 6.80E-14    | MUT-UP**** | Promote tumor growth and drug resistance | doi: 10.3389/fimmu.2021.687975 |
| Immune_Checkpoint_PCA                       | PCA       | 0.005025077 | MUT-Down** | Promote tumor growth and drug resistance | doi: 10.3389/fimmu.2021.687975 |
| Fatty_Acid_Biosynthesis_zscore              | zscore    | 0.002388137 | MUT-UP**   | Promote tumor growth and drug resistance | doi: 10.3389/fimmu.2021.687975 |
| DDR_PCA                                     | PCA       | 0.032062055 | MUT-Down*  | Immune-related                           | doi: 10.3389/fimmu.2021.687975 |

|                                                |             |              |                    |                                |
|------------------------------------------------|-------------|--------------|--------------------|--------------------------------|
| Cytokine_Receptors_Li_et_PCA<br>al_PCA         | 3.03E-07    | MUT-Down**** | Immune-<br>related | doi: 10.3389/fimmu.2021.687975 |
| TNF_Family_Members_Li_PCA<br>et_al_PCA         | 4.66E-06    | MUT-Down**** | Immune-<br>related | doi: 10.3389/fimmu.2021.687975 |
| Type_I_IFN_Reponse_Roo_PCA<br>ney_et_al_PCA    | 0.000198865 | MUT-Down***  | Immune-<br>related | doi: 10.3389/fimmu.2021.687975 |
| B_cells_Danaher_et_al_PC_PCA<br>A              | 0.000724846 | MUT-Down***  | Immune-<br>related | doi: 10.3389/fimmu.2021.687975 |
| pDCs_Rooney_et_al_PCA_PCA                      | 0.007961156 | MUT-Down**   | Immune-<br>related | doi: 10.3389/fimmu.2021.687975 |
| Co_stimulation_T_cell_Roo_PCA<br>ney_et_al_PCA | 0.001004661 | MUT-Down**   | Immune-<br>related | doi: 10.3389/fimmu.2021.687975 |
| NK_cells_Danaher_et_al_P_PCA<br>CA             | 0.001488431 | MUT-Down**   | Immune-<br>related | doi: 10.3389/fimmu.2021.687975 |
| T_cells_Danaher_et_al_PC_PCA<br>A              | 0.003240098 | MUT-Down**   | Immune-<br>related | doi: 10.3389/fimmu.2021.687975 |
| CD8_Rooney_et_al_PCA_PCA                       | 0.025298649 | MUT-Down*    | Immune-<br>related | doi: 10.3389/fimmu.2021.687975 |
| NK_CD56dim_cells_Danah_PCA<br>er_et_al_PCA     | 0.039282863 | MUT-Down*    | Immune-<br>related | doi: 10.3389/fimmu.2021.687975 |
| Cytotoxic_cells_Bindea_et_PCA<br>al_PCA        | 0.049477667 | MUT-Down*    | Immune-<br>related | doi: 10.3389/fimmu.2021.687975 |
